# Supplementary material for: Studies on the synthesis and properties of 1,1,1-trinitroprop-2-yl urea, carbamate and nitrocarbamate
Source: publisher site journal article supplement (doi:10.1515/znb-2016-0022), 2016-06-07
Supplement: Supplementary file 1 [file B16022-suppinfo2a.doc]

Supporting Information

Studies on the Synthesis and Properties of 1,1,1-Trinitroprop-2-yl Urea, Carbamate and Nitrocarbamate

Quirin J. Axthammer, Thomas M. Klapötke* and Burkhard Krumm

DOI: 10.1515/znb-2016-0022

Department of Chemistry, Energetic Materials Research, Ludwig-Maximilian University of Munich, Butenandtstraße 5–13 (D), 81377 Munich, Germany

* Prof. Dr. Thomas Klapötke, Fax: +49-89-2180-77492, E-mail: tmk@cup.uni-muenchen.de

**Table of Content**

**1. Single crystal X-ray diffraction**

**2. Calculated detonation and combustion parameters**

**1. Single crystal X-ray diffraction**

**1.1. *N*,*N*`-bis(1,1,1-trinitropropan-2-yl)urea (1)**

**
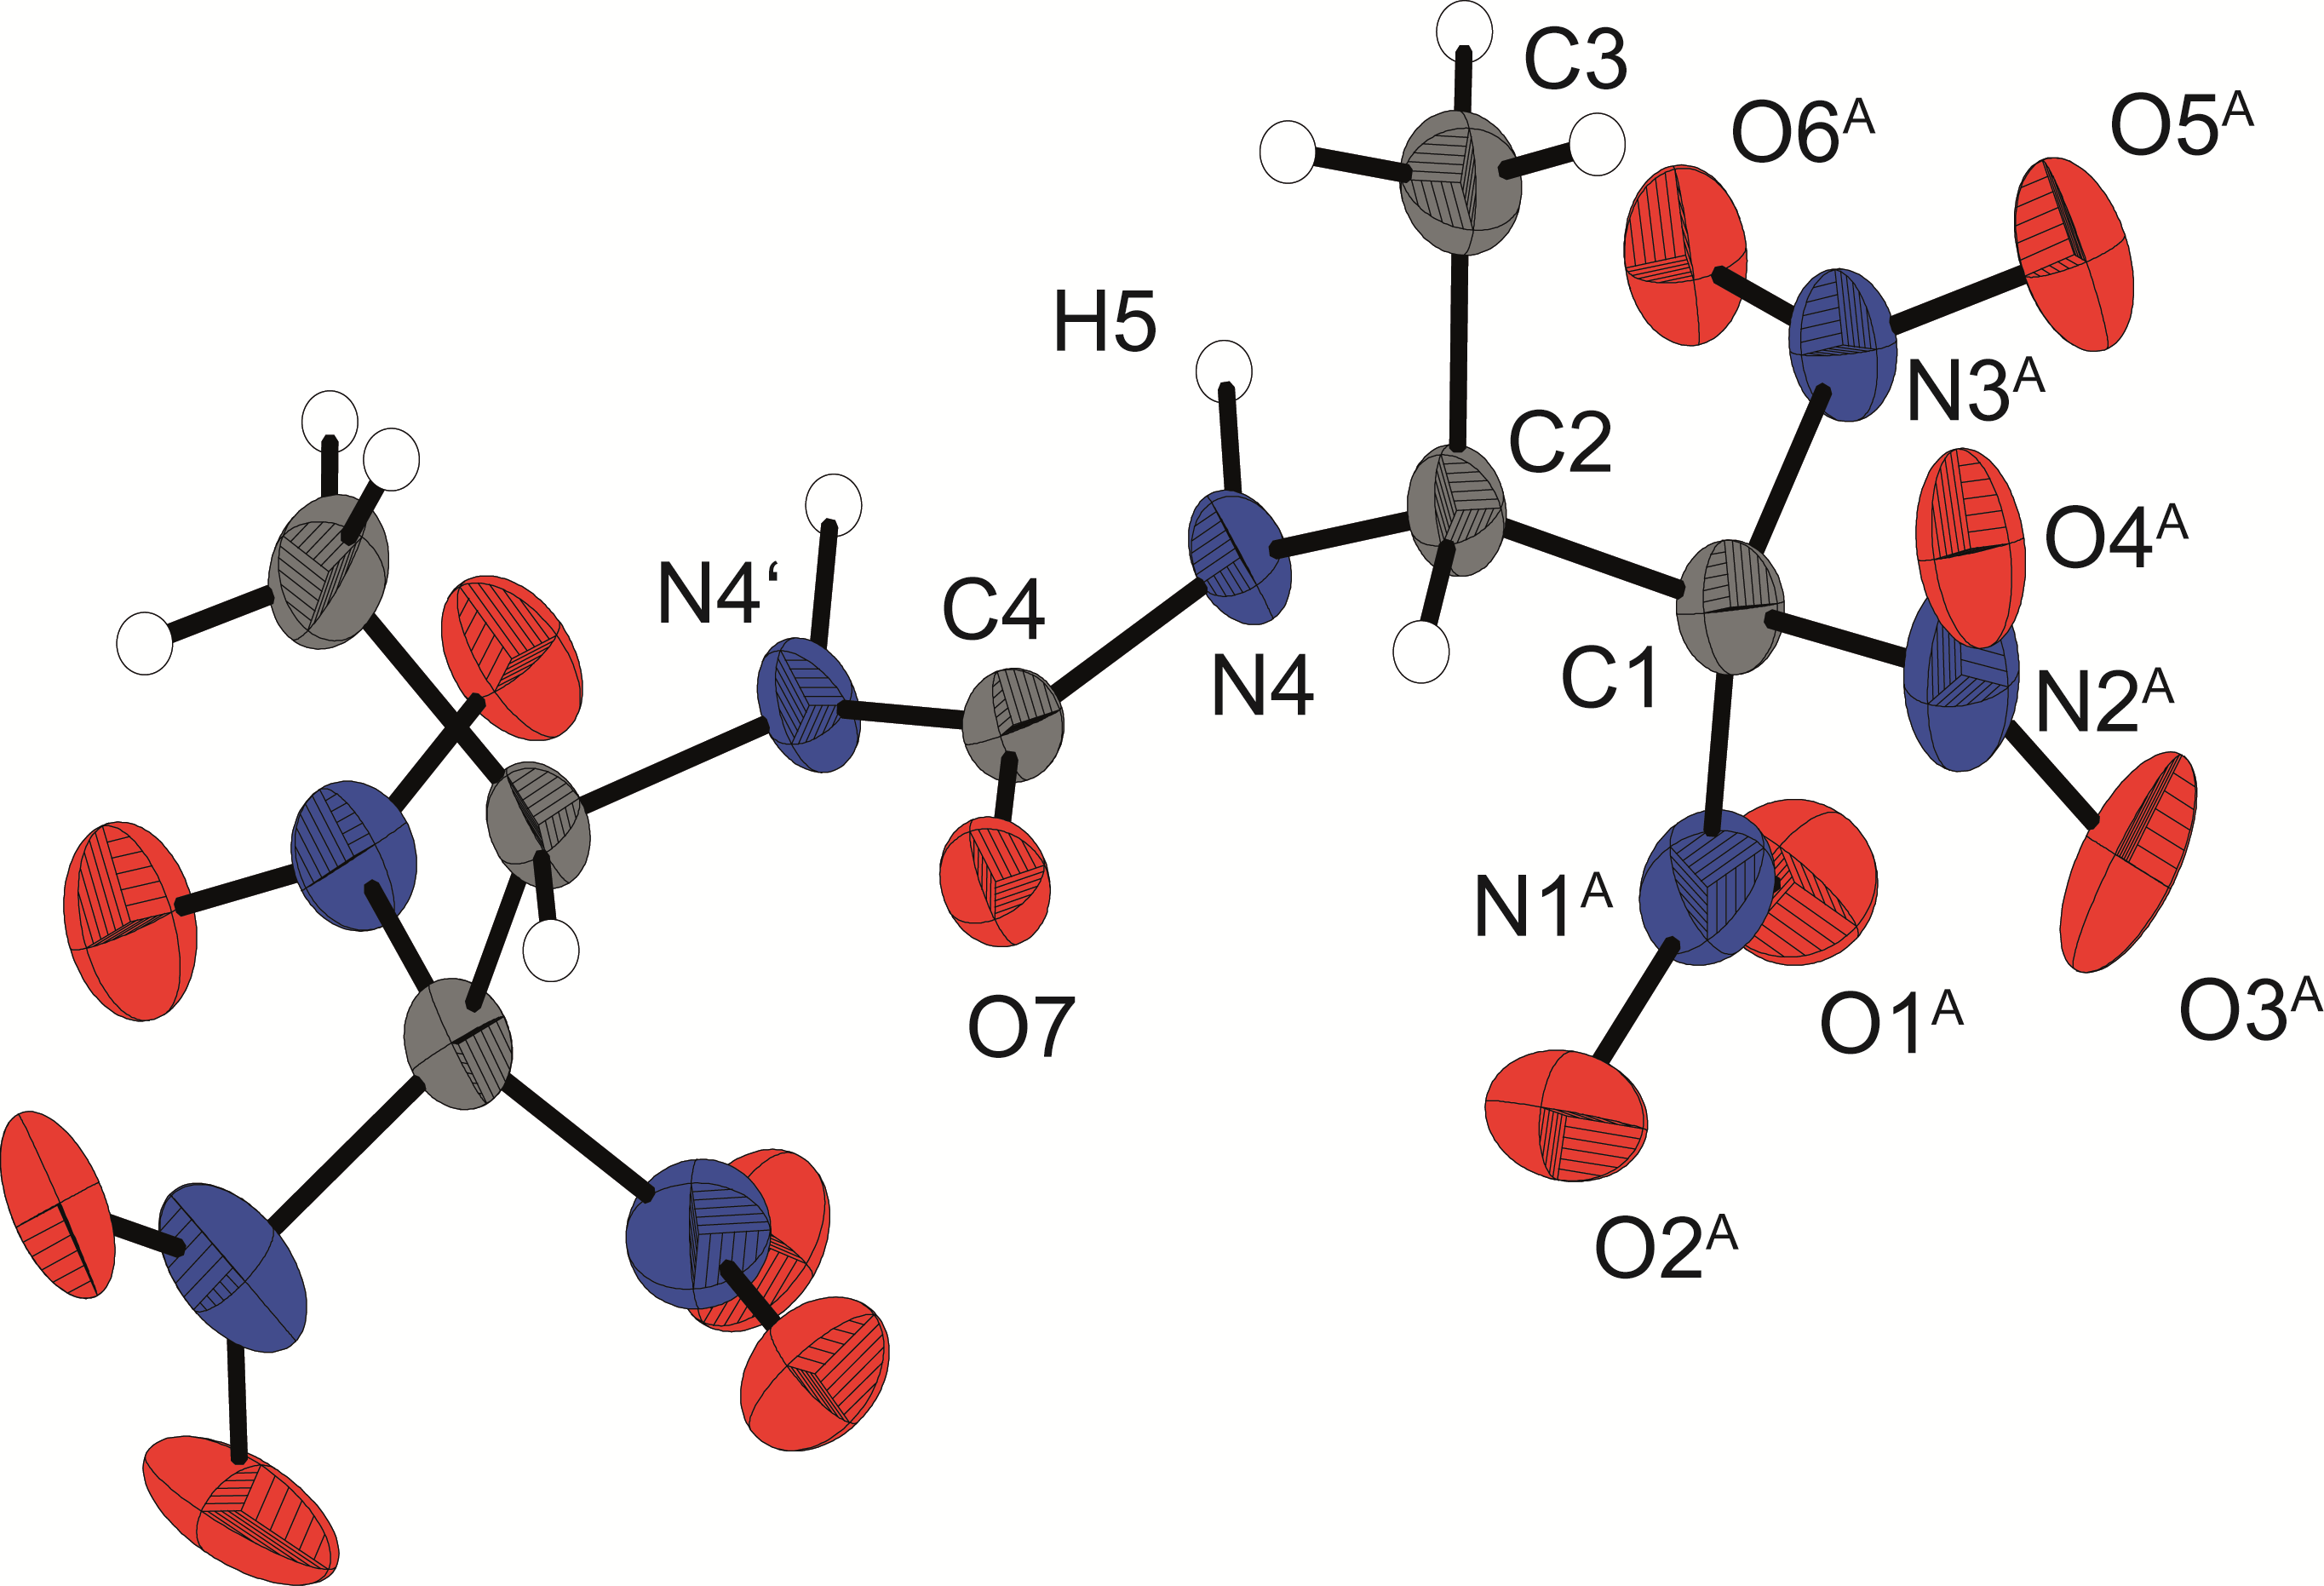
**

**
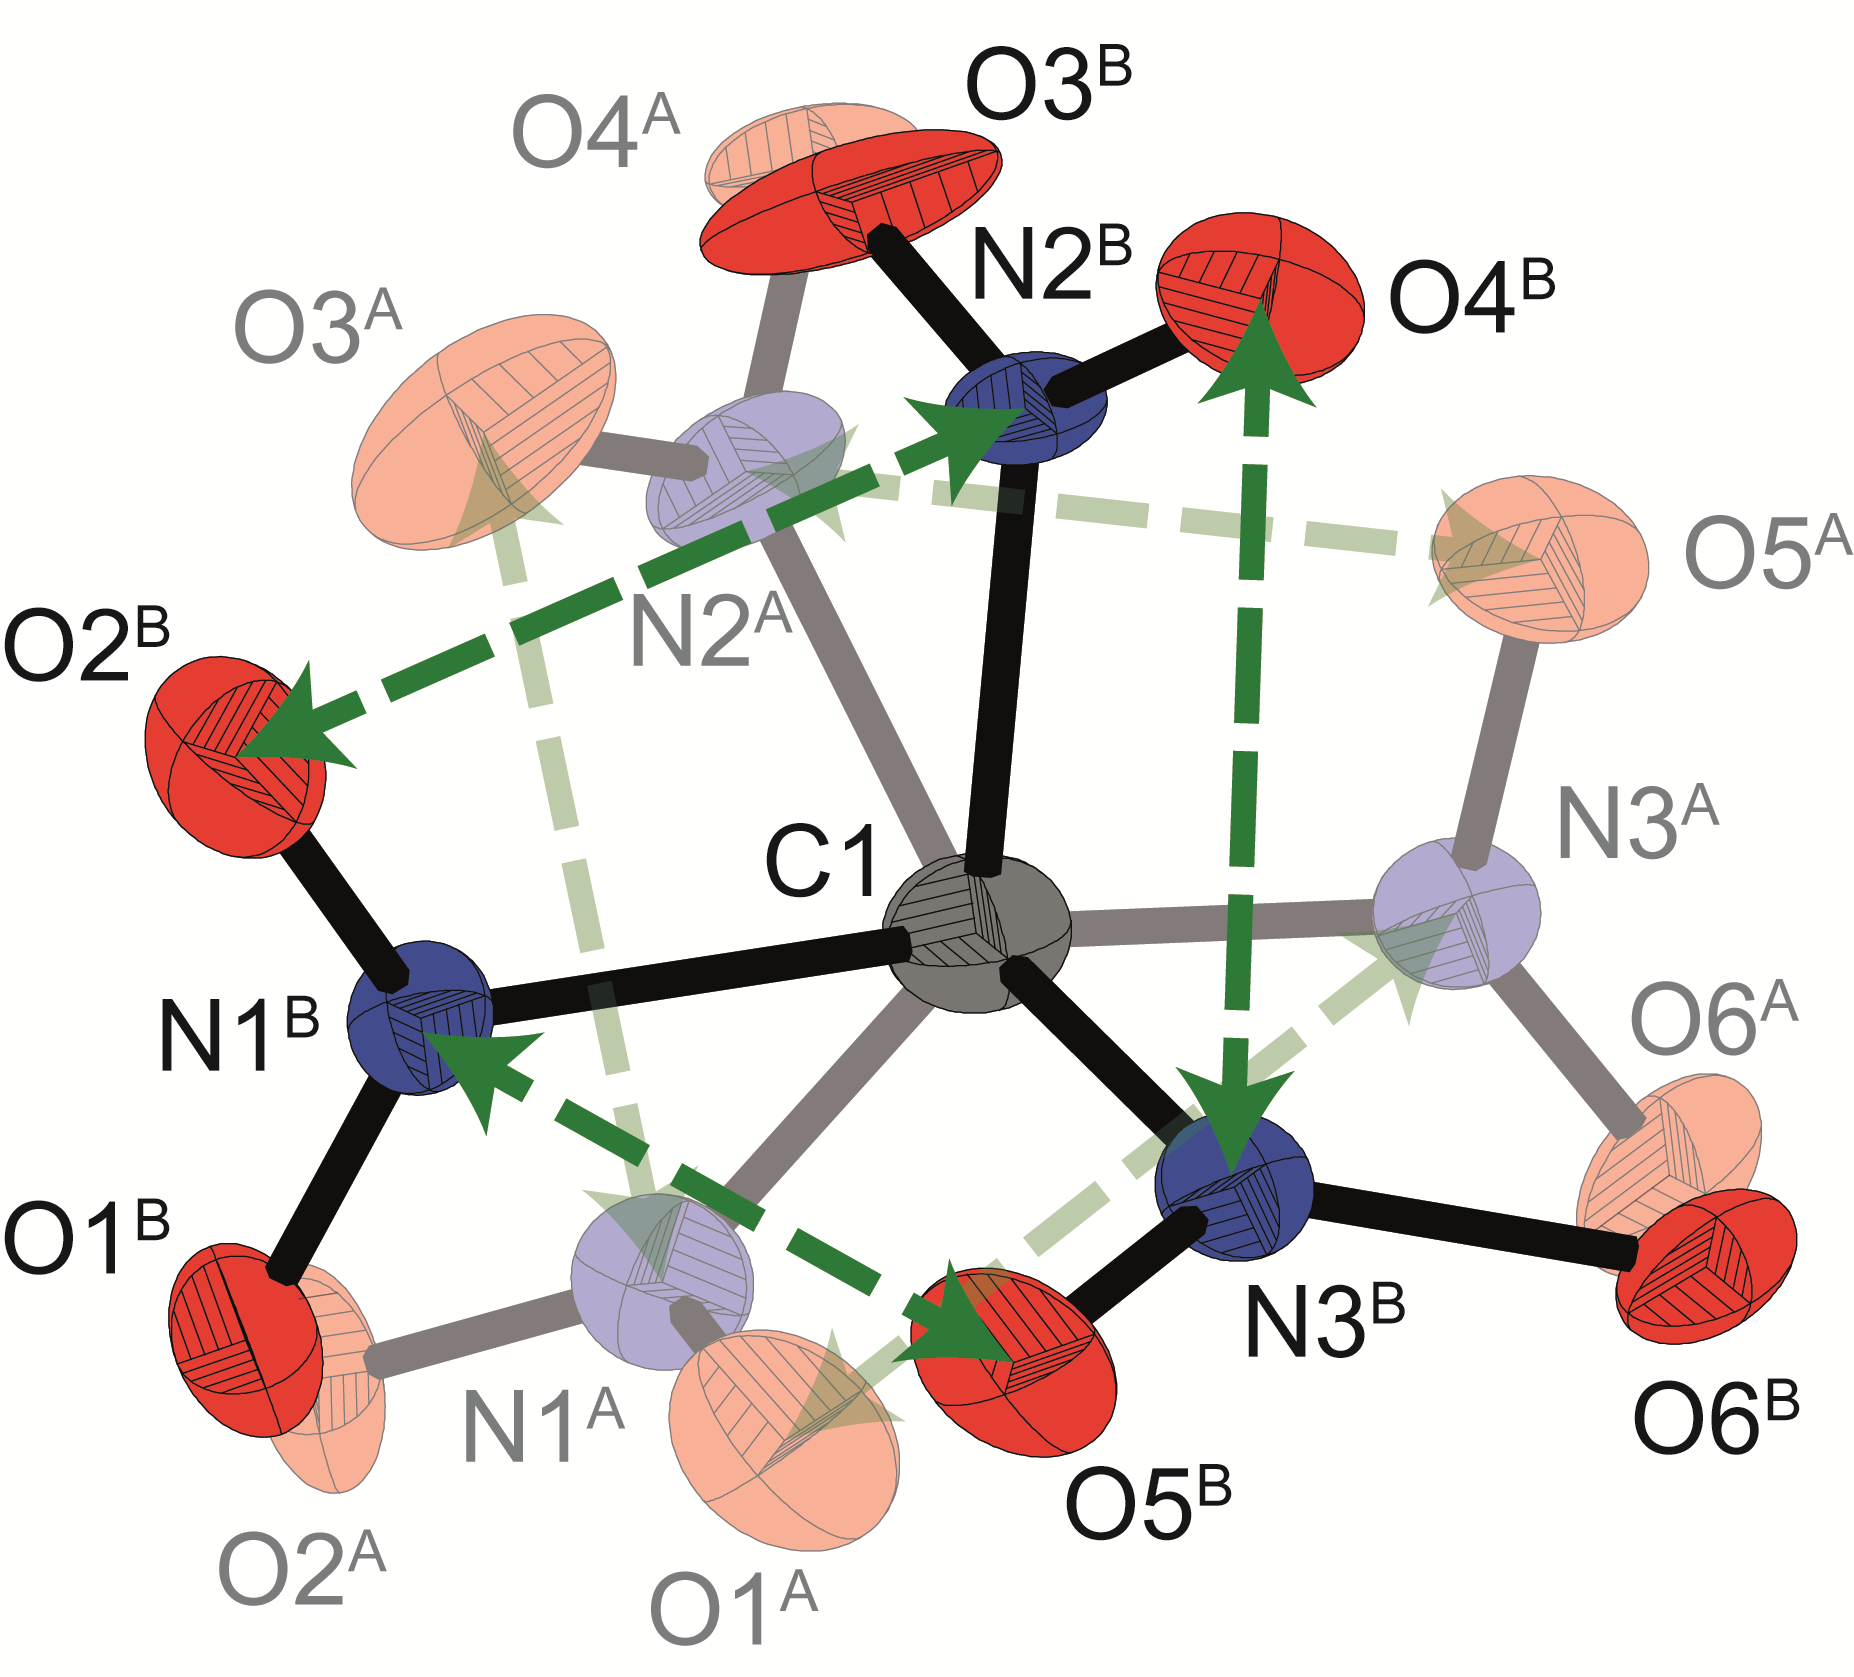
**

Selected bond lengths of compound **1**:

C1–N1A 1.529(5), C1–N2A 1.495(5), C1–N3A 1.578(4), C1–C2 1.534(3), O2A–N1A 1.48(1), O1A–N1A 1.221(8), N2A–O3A 1.207(8), N2A–O4A 1.21(1), N3A–O5A 1.207(5), N3A–O6A 1.23(2), C2–C3 1.520(3), C2–N4 1.441(3), C2–H1 1.00(2), C4–N4 1.360(3), C4–O7 1.231(4), N4–H5 0.80(2)

Selected angles of compound **1**:

N4–C4–N4 113.7, N4–C4–O7 123.1(1), C4–N4–C2 121.1(2), C2–C1–N1A 113.9(2), C2–C1–N2A 116.3(3), C2–C1–N3A 110.5(2), N2A–C1–N3A 105.0(3), N3A–C1–N1A 104.1(2), N1A–C1–N2A 106.1(3)

Selected torsion angles of compound **1**:

O7–C4–N4–H5 173(2), O7–C4–N4–C2 10.8(2), H5–N4–C2–H1 −172(2), N4–C2–C3–H3 −176(2), N4–C2–C1–N2A −160.6(3), H1–C2–C3–H2 −171(2)

Short contact distances of compound **1**:

O3A–N1A 2.539(6), O1A–N3A 2.601(8), O5A–N2A 2.545(6), O6B–N1B 2.501(1), O4B–N3B 2.573(8), O2B–N2B 2.545(9)

**Table S1.** Hydrogen bonds of compound **1**.

| D‒H···A | | | sym. of A | H···A | D‒H | D···A | ∠, DHA |
| --- | --- | --- | --- | --- | --- | --- | --- |
| C2 | H1 | O6A | −1/2+x,y,1.5−z | 2.738 | 1.00 | 3.640 | 150.6 |
| N4 | H5 | O8 |  | 2.101 | 0.80 | 2.862 | 158.4 |
| C6 | H6A | O7 | −1/2+x,1/2−y,1/2−z | 2.706 | 0.98 | 3.683 | 174.4 |
| C5 | H7B | O2A | −1/2+x,1/2−y,1.5−z | 2.561 | 0.99 | 3.329 | 134.3 |

**1.2 1,1,1-trinitropropan-2-yl carbamate (3)**


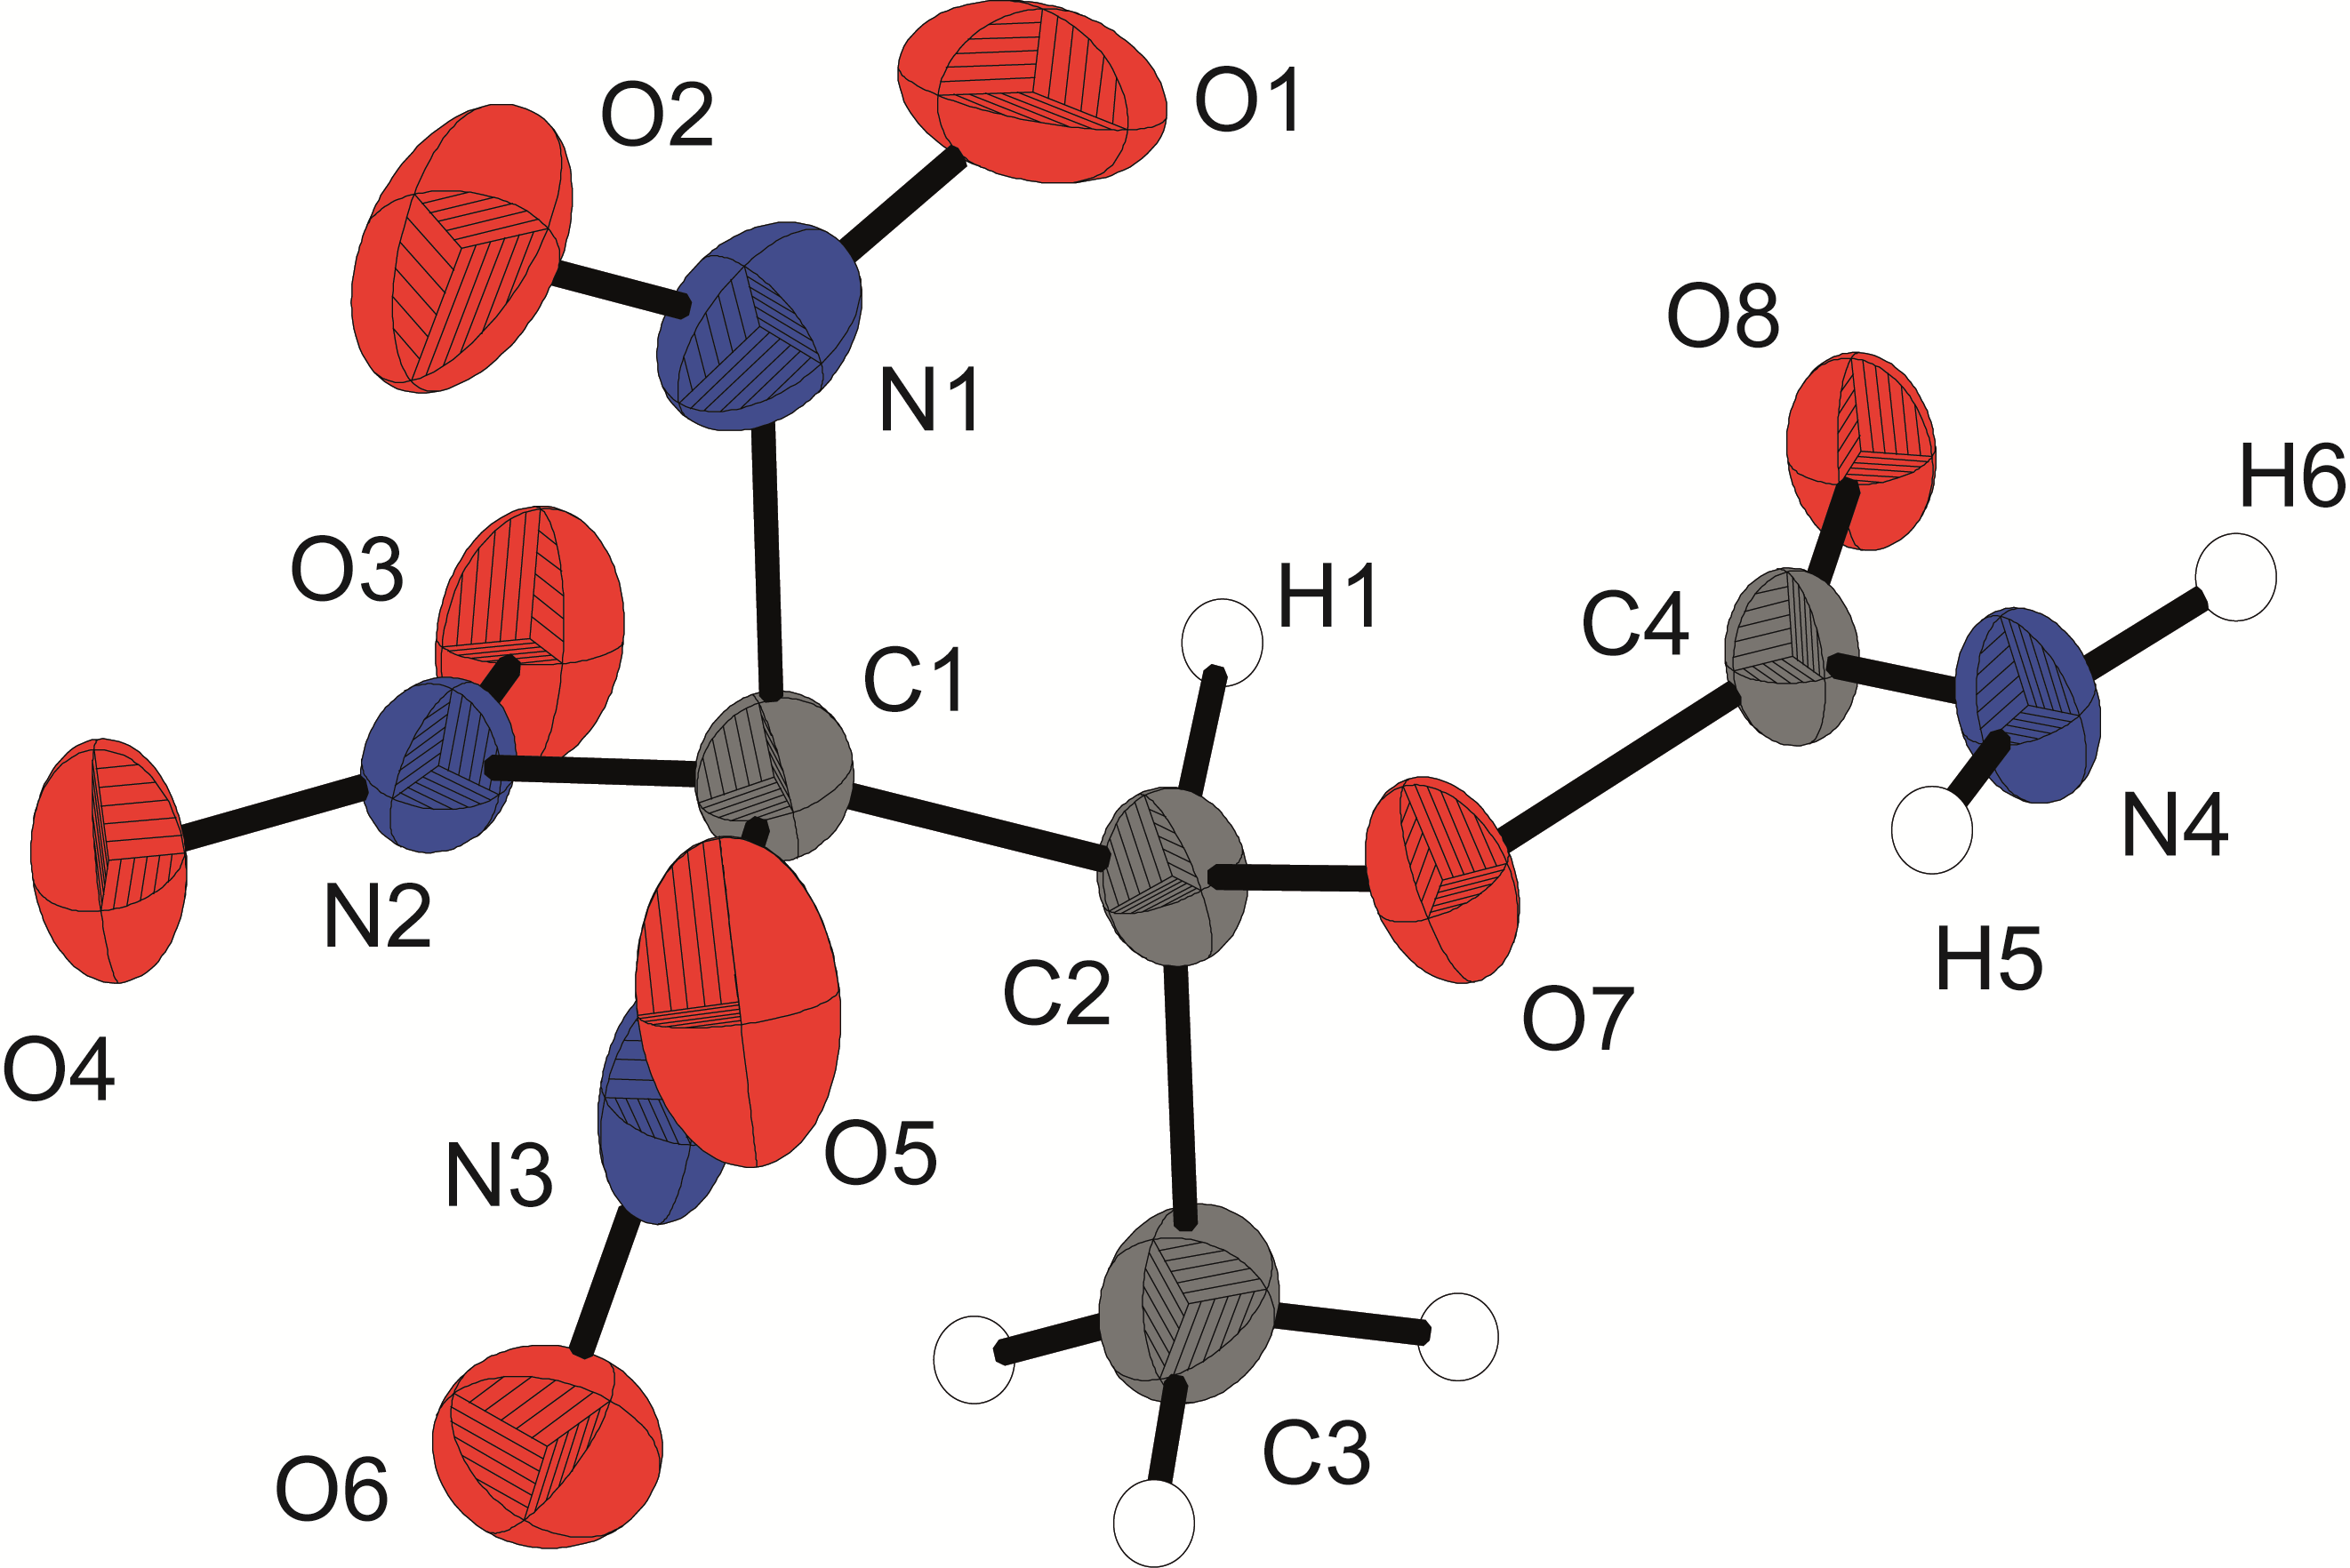


Selected bond lengths of compound **3**:

N1–O1 1.188(4), N1–O2 1.207(3), N1–C1 1.535(3), N2–O3 1.204(3), N2–O4 1.201(3), N2–C1 1.520(3), N3–O5 1.198(4), N3–O6 1.224(3), N3–C1 1.516(3), N4–C4 1.320(3), N4–H5 0.81(2), N4–H6 0.81(3), O7–C2 1.427(3), O7–C4 1.375(3), O8–C4 1.216(2), C1–C2 1.509(3), C2–C3 1.507(4), C2–H1 0.95(3), C3–H2 1.02(3), C3–H3 0.94(5), C3–H4 1.03(4)

Selected angles of compound **3**:

C2–C1–N3 111.3(2), C2–C1–N2 112.6(2), C2–C1–N1 112.8(2), O7–C2–H1 112(2), O7–C2–C3 109.6(2), H1–C2–C3 112(2), N2–C1–N1 103.5(2), N1–C1–N3 107.4(2), N3–C1–N2 108.8(2), C2–O7–C4 115.9(2), O7–C4–O8 122.4(2), O8–C4–N4 127.1(2), O7–C4–N4 110.4(2)

Selected torsion angles of compound **3**:

H6–N4–C4–O7 –180(2), H6–N4–C4–O8 1(2), N4–C4–O7–C2 –176.0(2), H1–C2–C3–H3 176(3), O7–C2–C3–H2 169(2), H1–C2–C1–N3 –174(2), O7–C2–C1–N2 –179.0(2)

Short contact distances of compound **3**:

O7–N3 2.749(3), O5–N1 2.625(3), O2–N2 2.796(3), O4–N3 2.664(3)

**Table S2.** Hydrogen bonds of compound **3**.

| D‒H···A | | | sym. of A | H···A | D‒H | D···A | ∠, DHA |
| --- | --- | --- | --- | --- | --- | --- | --- |
| N4 | H6 | O8 | 1−x,1−y,1−z | 2.214 | 0.81 | 2.969 | 156.3 |
| C3 | H2 | O4 | 2−x,−y,1−z | 2.796 | 1.02 | 3.761 | 159.0 |
| N4 | H5 | O8 | x,1/2−y,−1/2+z | 2.328 | 0.81 | 3.124 | 167.7 |
| C3 | H4 | O5 | x,1/2−y,−1/2+z | 2.735 | 1.03 | 3.603 | 142.3 |

**Table S3.** Calculated detonation and combustion parameters (using EXPLO5 V6.02 EOS BKWG-S).

|  | **1A** | **3A** | **4A** | **1B** | **3B** | **4B** | **1C** | **3C** | **4C** |
| --- | --- | --- | --- | --- | --- | --- | --- | --- | --- |
|  | C7H10N8O13 | C4H6N4O8 | C4H5N5O10 | C5H6N8O13 | C3H4N4O8 | C3H3N5O10 | C7H10N8O13 | C4H6N4O8 | C4H5N5O10 |
| density RT | 1.82 | 1.73 | 1.58 | 1.86 | 1.82 | 1.72 | 1.71 | 1.73 | 1.70 |
| *T*m /°C (onset) | 142 | 81 | (liquid) | 185 | 91 | 109 | - | 78 | 68 |
| *T*dec /°C (onset) | 144 | 154 | 133 | 187 | 169 | 153 | 160 | 152 | 134 |
| *IS* /J | 8 | 40 | 15 | 3 | 40 | 10 | 20 | > 40 | 30 |
| *FS* /N | 360 | 360 | >360 | 160 | 64 | 96 | 120 | > 360 | 360 |
| *ESD* /J | 0.20 | 0.15 | - | 0.30 | 0.15 | 0.10 | 0.40 | 0.30 | 0.20 |
| *N* /% | 27.1 | 23.5 | 24.7 | 29.0 | 25.0 | 26.0 | 27.1 | 23.5 | 24.7 |
| *O* /% | 50.2 | 53.8 | 56.5 | 53.9 | 57.1 | 59.5 | 50.2 | 53.8 | 56.5 |
| *N*+*O* /% | 77.3 | 77.3 | 81.2 | 82.9 | 82.1 | 85.5 | 77.3 | 77.3 | 81.2 |
| *ΩCO* /% | +3.9 | +6.7 | +19.8 | +20.7 | +21.4 | +32.7 | +3.9 | +6.7 | +19.8 |
| *ΩCO2* /% | −20.2 | −20.2 | −2.8 | 0.00 | +0.0 | +14.9 | −20.2 | −20.2 | −2.8 |
| *∆H*°f /kJ mol–1 | −367 | −500 | −368 | −307 | −459 | −366 | −522 | −504 | −402 |
| *∆U*°f /kJ kg–1 | −793 | −2005 | −1213 | −708 | −1961 | −1277 | −1092 | −2021 | −1331 |
| *Q*v /kJ kg–1 | −5390 | −4675 | −5878 | −5970 | −5286 | −4456 | −5095 | −4662 | −5809 |
| *T*ex /K | 3631 | 3334 | 4332 | 4181 | 3780 | 3618 | 3605 | 3328 | 4175 |
| *V*0 /L kg–1 | 724 | 744 | 762 | 755 | 761 | 750 | 732 | 724 | 755 |
| *P*CJ /kbar | 321 | 266 | 228 | 343 | 302 | 232 | 268 | 265 | 269 |
| *v*Det /m s–1 | 8469 | 7900 | 7680 | 8915 | 8530 | 7704 | 7937 | 7896 | 8134 |
| *I*s /s | 253 | 236 | 257 | 257 | 246 | 232 | 245 | 237 | 256 |
| *I*s /s (15 % Al) | 267 | 255 | 262 | 263 | 254 | 251 | 263 | 256 | 261 |
| *I*s /s (15 % Al, 14 % binder) | 249 | 240 | 254 | 256 | 247 | 261 | 245 | 240 | 253 |
