# Supplementary material for: Studies on the synthesis and properties of 1,1,1-trinitroprop-2-yl urea, carbamate and nitrocarbamate
Source: publisher site journal article supplement (doi:10.1515/znb-2016-0022), 2016-06-07
Supplement: Supplementary file 1 [file B16022-suppinfo2a.pdf › B16022-suppinfo2a.pdf]

# **Supporting Information**

## **Studies on the Synthesis and Properties of 1,1,1-Trinitroprop-2-yl Urea, Carbamate and Nitrocarbamate**

Quirin J. Axthammer, Thomas M. Klapötke\* and Burkhard Krumm

DOI: 10.1515/znb-2016-0022

Department of Chemistry, Energetic Materials Research, Ludwig-Maximilian University of Munich, Butenandtstraße 5–13 (D), 81377 Munich, Germany

\* Prof. Dr. Thomas Klapötke, Fax: +49-89-2180-77492, E-mail: [tmk@cup.uni-muenchen.de](mailto:tmk@cup.uni-muenchen.de)

### **Table of Content**

- 1. Single crystal X-ray diffraction**
- 2. Calculated detonation and combustion parameters**

## 1. Single crystal X-ray diffraction

### 1.1. *N,N'*-bis(1,1,1-trinitropropan-2-yl)urea (**1**)

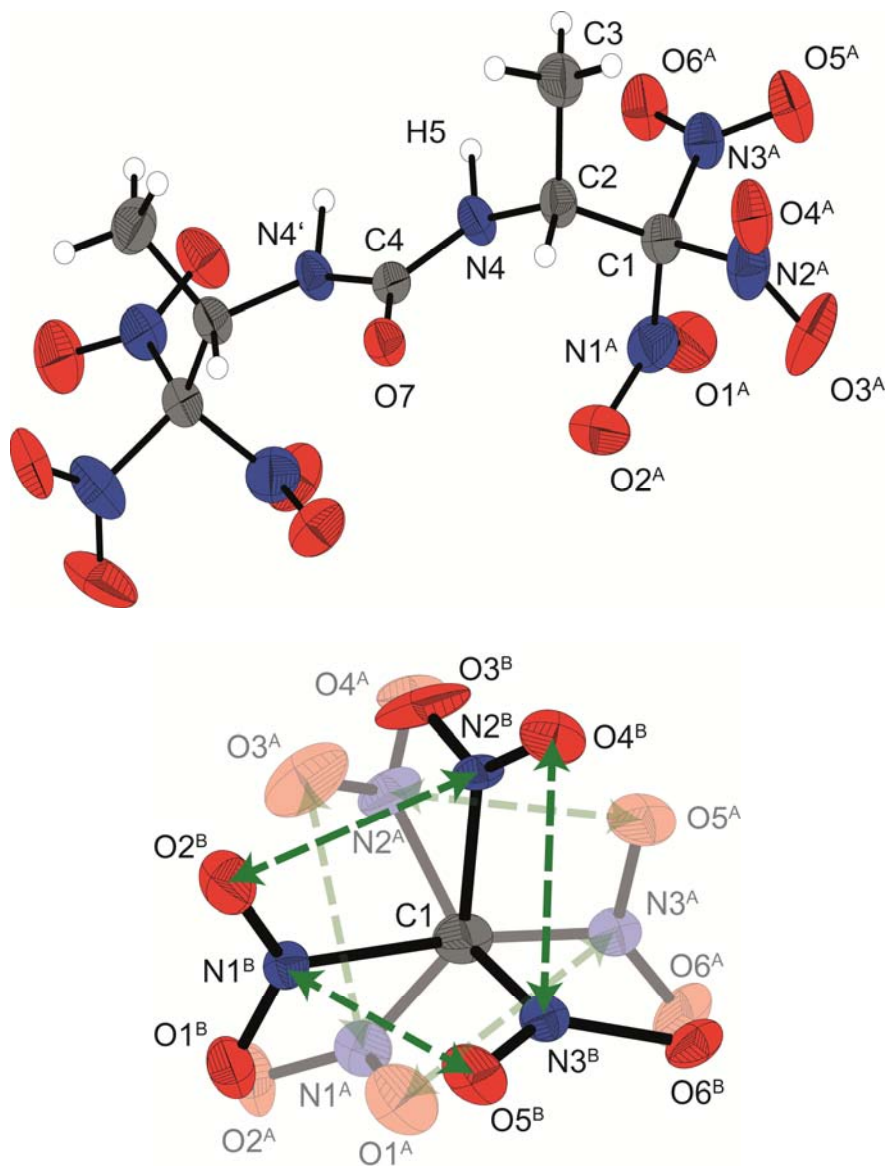

Selected bond lengths of compound **1**:

C1–N1<sup>A</sup> 1.529(5), C1–N2<sup>A</sup> 1.495(5), C1–N3<sup>A</sup> 1.578(4), C1–C2 1.534(3), O2<sup>A</sup>–N1<sup>A</sup> 1.48(1),  
O1<sup>A</sup>–N1<sup>A</sup> 1.221(8), N2<sup>A</sup>–O3<sup>A</sup> 1.207(8), N2<sup>A</sup>–O4<sup>A</sup> 1.21(1), N3<sup>A</sup>–O5<sup>A</sup> 1.207(5), N3<sup>A</sup>–O6<sup>A</sup>  
1.23(2), C2–C3 1.520(3), C2–N4 1.441(3), C2–H1 1.00(2), C4–N4 1.360(3), C4–O7 1.231(4),  
N4–H5 0.80(2)

Selected angles of compound **1**:

N4–C4–N4 113.7, N4–C4–O7 123.1(1), C4–N4–C2 121.1(2), C2–C1–N1A 113.9(2), C2–C1–N2A 116.3(3), C2–C1–N3A 110.5(2), N2A–C1–N3A 105.0(3), N3A–C1–N1A 104.1(2), N1A–C1–N2A 106.1(3)

Selected torsion angles of compound **1**:

O7–C4–N4–H5 173(2), O7–C4–N4–C2 10.8(2), H5–N4–C2–H1 –172(2), N4–C2–C3–H3 –176(2), N4–C2–C1–N2A –160.6(3), H1–C2–C3–H2 –171(2)

Short contact distances of compound **1**:

O3A–N1A 2.539(6), O1A–N3A 2.601(8), O5A–N2A 2.545(6), O6B–N1B 2.501(1), O4B–N3B 2.573(8), O2B–N2B 2.545(9)

**Table S1.** Hydrogen bonds of compound **1**.

| D–H···A |     |     | sym. of A            | H···A | D–H  | D···A | ∠, DHA |
|---------|-----|-----|----------------------|-------|------|-------|--------|
| C2      | H1  | O6A | $-1/2+x,y,1.5-z$     | 2.738 | 1.00 | 3.640 | 150.6  |
| N4      | H5  | O8  |                      | 2.101 | 0.80 | 2.862 | 158.4  |
| C6      | H6A | O7  | $-1/2+x,1/2-y,1/2-z$ | 2.706 | 0.98 | 3.683 | 174.4  |
| C5      | H7B | O2A | $-1/2+x,1/2-y,1.5-z$ | 2.561 | 0.99 | 3.329 | 134.3  |

## 1.2 1,1,1-trinitropropan-2-yl carbamate (3)

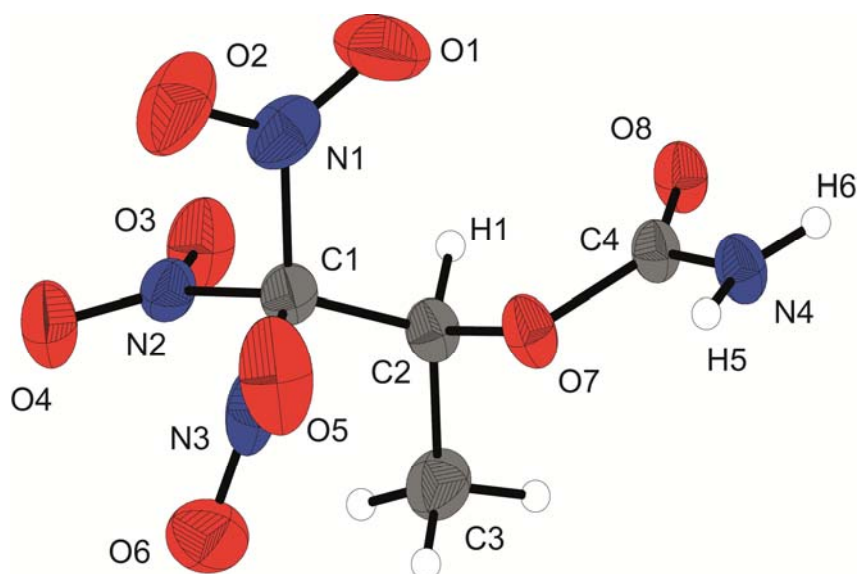

Selected bond lengths of compound **3**:

N1–O1 1.188(4), N1–O2 1.207(3), N1–C1 1.535(3), N2–O3 1.204(3), N2–O4 1.201(3), N2–C1 1.520(3), N3–O5 1.198(4), N3–O6 1.224(3), N3–C1 1.516(3), N4–C4 1.320(3), N4–H5 0.81(2), N4–H6 0.81(3), O7–C2 1.427(3), O7–C4 1.375(3), O8–C4 1.216(2), C1–C2 1.509(3), C2–C3 1.507(4), C2–H1 0.95(3), C3–H2 1.02(3), C3–H3 0.94(5), C3–H4 1.03(4)

Selected angles of compound **3**:

C2–C1–N3 111.3(2), C2–C1–N2 112.6(2), C2–C1–N1 112.8(2), O7–C2–H1 112(2), O7–C2–C3 109.6(2), H1–C2–C3 112(2), N2–C1–N1 103.5(2), N1–C1–N3 107.4(2), N3–C1–N2 108.8(2), C2–O7–C4 115.9(2), O7–C4–O8 122.4(2), O8–C4–N4 127.1(2), O7–C4–N4 110.4(2)

Selected torsion angles of compound **3**:

H6–N4–C4–O7 –180(2), H6–N4–C4–O8 1(2), N4–C4–O7–C2 –176.0(2), H1–C2–C3–H3 176(3), O7–C2–C3–H2 169(2), H1–C2–C1–N3 –174(2), O7–C2–C1–N2 –179.0(2)

Short contact distances of compound **3**:

O7–N3 2.749(3), O5–N1 2.625(3), O2–N2 2.796(3), O4–N3 2.664(3)

**Table S2.** Hydrogen bonds of compound **3**.

| D–H···A |    |    | sym. of A          | H···A | D–H  | D···A | ∠, DHA |
|---------|----|----|--------------------|-------|------|-------|--------|
| N4      | H6 | O8 | $1-x, 1-y, 1-z$    | 2.214 | 0.81 | 2.969 | 156.3  |
| C3      | H2 | O4 | $2-x, -y, 1-z$     | 2.796 | 1.02 | 3.761 | 159.0  |
| N4      | H5 | O8 | $x, 1/2-y, -1/2+z$ | 2.328 | 0.81 | 3.124 | 167.7  |
| C3      | H4 | O5 | $x, 1/2-y, -1/2+z$ | 2.735 | 1.03 | 3.603 | 142.3  |

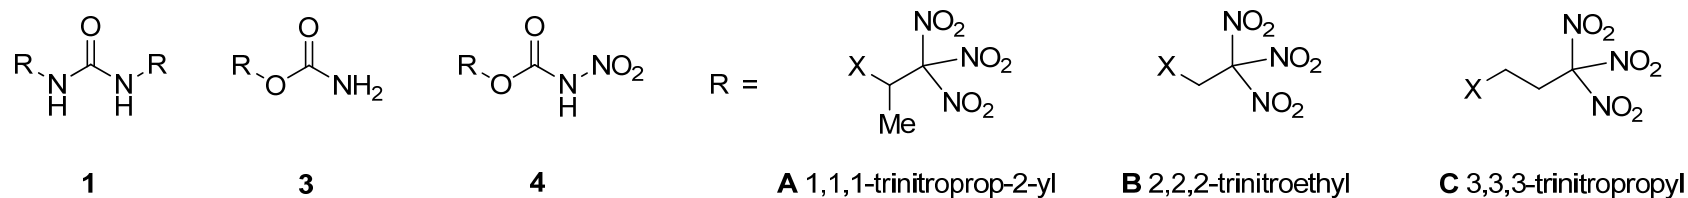

**Table S3.** Calculated detonation and combustion parameters (using EXPLO5 V6.02 EOS BKWG-S).

|                                                | 1A                                                            | 3A                                                          | 4A                                                           | 1B                                                           | 3B                                                          | 4B                                                           | 1C                                                            | 3C                                                          | 4C                                                           |
|------------------------------------------------|---------------------------------------------------------------|-------------------------------------------------------------|--------------------------------------------------------------|--------------------------------------------------------------|-------------------------------------------------------------|--------------------------------------------------------------|---------------------------------------------------------------|-------------------------------------------------------------|--------------------------------------------------------------|
|                                                | C <sub>7</sub> H <sub>10</sub> N <sub>8</sub> O <sub>13</sub> | C <sub>4</sub> H <sub>6</sub> N <sub>4</sub> O <sub>8</sub> | C <sub>4</sub> H <sub>5</sub> N <sub>5</sub> O <sub>10</sub> | C <sub>5</sub> H <sub>6</sub> N <sub>8</sub> O <sub>13</sub> | C <sub>3</sub> H <sub>4</sub> N <sub>4</sub> O <sub>8</sub> | C <sub>3</sub> H <sub>3</sub> N <sub>5</sub> O <sub>10</sub> | C <sub>7</sub> H <sub>10</sub> N <sub>8</sub> O <sub>13</sub> | C <sub>4</sub> H <sub>6</sub> N <sub>4</sub> O <sub>8</sub> | C <sub>4</sub> H <sub>5</sub> N <sub>5</sub> O <sub>10</sub> |
| density RT                                     | 1.82                                                          | 1.73                                                        | 1.58                                                         | 1.86                                                         | 1.82                                                        | 1.72                                                         | 1.71                                                          | 1.73                                                        | 1.70                                                         |
| <i>T<sub>m</sub></i> /°C (onset)               | 142                                                           | 81                                                          | (liquid)                                                     | 185                                                          | 91                                                          | 109                                                          | -                                                             | 78                                                          | 68                                                           |
| <i>T<sub>dec</sub></i> /°C (onset)             | 144                                                           | 154                                                         | 133                                                          | 187                                                          | 169                                                         | 153                                                          | 160                                                           | 152                                                         | 134                                                          |
| <i>IS</i> /J                                   | 8                                                             | 40                                                          | 15                                                           | 3                                                            | 40                                                          | 10                                                           | 20                                                            | > 40                                                        | 30                                                           |
| <i>FS</i> /N                                   | 360                                                           | 360                                                         | >360                                                         | 160                                                          | 64                                                          | 96                                                           | 120                                                           | > 360                                                       | 360                                                          |
| <i>ESD</i> /J                                  | 0.20                                                          | 0.15                                                        | -                                                            | 0.30                                                         | 0.15                                                        | 0.10                                                         | 0.40                                                          | 0.30                                                        | 0.20                                                         |
| <i>N</i> /%                                    | 27.1                                                          | 23.5                                                        | 24.7                                                         | 29.0                                                         | 25.0                                                        | 26.0                                                         | 27.1                                                          | 23.5                                                        | 24.7                                                         |
| <i>O</i> /%                                    | 50.2                                                          | 53.8                                                        | 56.5                                                         | 53.9                                                         | 57.1                                                        | 59.5                                                         | 50.2                                                          | 53.8                                                        | 56.5                                                         |
| <i>N+O</i> /%                                  | 77.3                                                          | 77.3                                                        | 81.2                                                         | 82.9                                                         | 82.1                                                        | 85.5                                                         | 77.3                                                          | 77.3                                                        | 81.2                                                         |
| <i>Ω<sub>CO</sub></i> /%                       | +3.9                                                          | +6.7                                                        | +19.8                                                        | +20.7                                                        | +21.4                                                       | +32.7                                                        | +3.9                                                          | +6.7                                                        | +19.8                                                        |
| <i>Ω<sub>CO2</sub></i> /%                      | -20.2                                                         | -20.2                                                       | -2.8                                                         | 0.00                                                         | +0.0                                                        | +14.9                                                        | -20.2                                                         | -20.2                                                       | -2.8                                                         |
| <i>ΔH<sub>f</sub></i> /kJ mol <sup>-1</sup>    | -367                                                          | -500                                                        | -368                                                         | -307                                                         | -459                                                        | -366                                                         | -522                                                          | -504                                                        | -402                                                         |
| <i>ΔU<sub>f</sub></i> /kJ kg <sup>-1</sup>     | -793                                                          | -2005                                                       | -1213                                                        | -708                                                         | -1961                                                       | -1277                                                        | -1092                                                         | -2021                                                       | -1331                                                        |
| <i>Q<sub>v</sub></i> /kJ kg <sup>-1</sup>      | -5390                                                         | -4675                                                       | -5878                                                        | -5970                                                        | -5286                                                       | -4456                                                        | -5095                                                         | -4662                                                       | -5809                                                        |
| <i>T<sub>ex</sub></i> /K                       | 3631                                                          | 3334                                                        | 4332                                                         | 4181                                                         | 3780                                                        | 3618                                                         | 3605                                                          | 3328                                                        | 4175                                                         |
| <i>V<sub>0</sub></i> /L kg <sup>-1</sup>       | 724                                                           | 744                                                         | 762                                                          | 755                                                          | 761                                                         | 750                                                          | 732                                                           | 724                                                         | 755                                                          |
| <i>P<sub>Cl</sub></i> /kbar                    | 321                                                           | 266                                                         | 228                                                          | 343                                                          | 302                                                         | 232                                                          | 268                                                           | 265                                                         | 269                                                          |
| <i>v<sub>Det</sub></i> /m s <sup>-1</sup>      | 8469                                                          | 7900                                                        | 7680                                                         | 8915                                                         | 8530                                                        | 7704                                                         | 7937                                                          | 7896                                                        | 8134                                                         |
| <i>I<sub>s</sub></i> /s                        | 253                                                           | 236                                                         | 257                                                          | 257                                                          | 246                                                         | 232                                                          | 245                                                           | 237                                                         | 256                                                          |
| <i>I<sub>s</sub></i> /s (15 % Al)              | 267                                                           | 255                                                         | 262                                                          | 263                                                          | 254                                                         | 251                                                          | 263                                                           | 256                                                         | 261                                                          |
| <i>I<sub>s</sub></i> /s (15 % Al, 14 % binder) | 249                                                           | 240                                                         | 254                                                          | 256                                                          | 247                                                         | 261                                                          | 245                                                           | 240                                                         | 253                                                          |
